# Supplementary material for: A multi-layered regulatory model uncovers the central role of OsPRR37 in coordinating multiple agronomic traits
Source: Research Square preprint supplement (doi:10.21203/rs.3.rs-7366051/v1), 2025-09-12
Supplement: Supplementary file 1 [file ae8b2904df2f65fd76e04cc4.xlsx]

## Sheet: Table S1
Table S1. Alignment and assignment statistics for RNA-seq.
Sample	Total Reads	Uniquely Mapped Reads	Uniquely Mapped Reads Percentage	Overall Alignment Rate	Assigned Reads	Assigned Reads Percentage
KO42_R1	21394948	20061385	0.9377	0.9557	18304309	0.8555
KO42_R2	22556677	21158043	0.938	0.9529	19369703	0.8587
KO42_R3	22641130	21165135	0.9348	0.9401	19328909	0.8537
NIL37_R1	22058573	20640362	0.9357	0.9519	19008747	0.8617
NIL37_R2	20315051	18999312	0.9352	0.9507	17402562	0.8566
NIL37_R3	24901303	23300562	0.9357	0.929	21392624	0.8591

## Sheet: Table S2
Table S2. Motifs identified in the potential target genes of OsPRR37.
MSU_ID	Gene_name	Motif_id	Matched_sequence	Feature	Genomic_location	Start	Stop	Strand	Score	P.value	Q.value
LOC_Os01g71840	LOC_Os01g71840	RARGARRAGRAR	GGGAAGAAGGAA	Promoter	Chr1:41605636-41605820(+)	118	129	+	11.4286	5.94e-05	0.0476
LOC_Os01g71840	LOC_Os01g71840	YYTYTCYYYCTC	CTTTCCTTCTTC	Promoter	Chr1:41605636-41605820(+)	120	131	-	11.2857	6.93e-05	0.0371
LOC_Os01g71840	LOC_Os01g71840	RARGARRAGRAR	GAAGAAGGAAAG	Promoter	Chr1:41605636-41605820(+)	120	131	+	11.1688	6.96e-05	0.051
LOC_Os03g09120	LOC_Os03g09120	YYTYTCYYYCTC	CTTCTCTTCCTC	Promoter	Chr3:4751434-4752044(-)	56	67	+	15.9351	2.05e-06	0.01
LOC_Os03g09120	LOC_Os03g09120	RARGARRAGRAR	GAGGAAGAGAAG	Promoter	Chr3:4751434-4752044(-)	56	67	-	15.039	4.03e-06	0.0264
LOC_Os03g09120	LOC_Os03g09120	RARGARRAGRAR	GGGGAGGAAGAG	Promoter	Chr3:4751434-4752044(-)	59	70	-	13.5714	1.37e-05	0.031
LOC_Os03g09120	LOC_Os03g09120	YYTYTCYYYCTC	TCTCTTCCTCCC	Promoter	Chr3:4751434-4752044(-)	58	69	+	11.8182	5.39e-05	0.0357
LOC_Os03g09120	LOC_Os03g09120	RARGARRAGRAR	GAAGAGAAGGGA	Promoter	Chr3:4751434-4752044(-)	53	64	-	11.2857	6.43e-05	0.0493
LOC_Os03g09120	LOC_Os03g09120	YYTYTCYYYCTC	TCCCTTCTCTTC	Promoter	Chr3:4751434-4752044(-)	53	64	+	11.1299	7.38e-05	0.0377
LOC_Os03g09120	LOC_Os03g09120	YYTYTCYYYCTC	TCTTCCTCCCCC	Promoter	Chr3:4751434-4752044(-)	60	71	+	11.039	7.8e-05	0.0384
LOC_Os03g09120	LOC_Os03g09120	YYTYTCYYYCTC	CTCTTCCTCCCC	Promoter	Chr3:4751434-4752044(-)	59	70	+	10.4805	9.87e-05	0.0415
LOC_Os03g25440	LOC_Os03g25440	RARGARRAGRAR	AGGGAGAGGGAG	Promoter	Chr3:14542278-14542541(+)	250	261	+	11.974	4.36e-05	0.042
LOC_Os06g50450	LOC_Os06g50450	RARGARRAGRAR	AAGGAGAAAGAA	Promoter	Chr6:30541255-30541502(+)	169	180	+	14.3247	7.13e-06	0.0273
LOC_Os06g50450	LOC_Os06g50450	RARGARRAGRAR	AAAGAAAAAGAA	Promoter	Chr6:30541255-30541502(+)	27	38	+	13.6623	1.29e-05	0.031
LOC_Os10g33900	LOC_Os10g33900	RARGARRAGRAR	AGAGAGGAGGAG	Promoter	Chr10:18000573-18000833(+)	217	228	-	15.4286	2.71e-06	0.0246
LOC_Os10g33900	LOC_Os10g33900	YYTYTCYYYCTC	TCTCCTCCTCTC	Promoter	Chr10:18000573-18000833(+)	216	227	+	13.026	2.58e-05	0.0289
LOC_Os10g33900	LOC_Os10g33900	YYTYTCYYYCTC	TCCTCCTCTCTC	Promoter	Chr10:18000573-18000833(+)	218	229	+	12.8182	3.02e-05	0.0303
LOC_Os10g33900	LOC_Os10g33900	YYTYTCYYYCTC	TCTCTCCTCTCC	Promoter	Chr10:18000573-18000833(+)	224	235	+	11.4416	6.5e-05	0.0366
LOC_Os10g33900	LOC_Os10g33900	YYTYTCYYYCTC	TCCTCTCTCCTC	Promoter	Chr10:18000573-18000833(+)	221	232	+	10.5844	9.39e-05	0.0406
LOC_Os11g12740	SP1	GRGAGARRAGR	GAAAGGAGGGG	Intergenic	Chr11:7203148-7203343(-)	130	140	+	11.9605	5.4e-05	0.0495
LOC_Os01g47840	SDRLK-2	GAAGAAGADRAD	CAAGAAGAACAA	Genebody	Chr1:27388591-27388808(+)	27	38	-	11.6	5.14e-05	0.0523
LOC_Os01g71840	LOC_Os01g71840	CAGGAGAAGTTG	CCGGAGAGGTTG	Genebody	Chr1:41613882-41614311(+)	80	91	+	10.102	7.23e-06	0.0886
LOC_Os01g71840	LOC_Os01g71840	CAGGAGAAGTTG	CCGGAGACGTTG	Genebody	Chr1:41613882-41614311(+)	293	304	+	4.59184	1.51e-05	0.138
LOC_Os07g49110	LOC_Os07g49110	GAAGAAGADRAD	AATGATGAAGAG	Genebody	Chr7:29393240-29393459(+)	80	91	-	10.5286	9.07e-05	0.0711
LOC_Os08g10550	OsHAK12	AGAAGCATGCCC	AGGAGAAGGCAA	Genebody	Chr8:6208987-6209221(+)	86	97	-	7.52809	2.2e-05	0.199
LOC_Os11g03130	LOC_Os11g03130	CAGGAGAAGTTG	CAAGAGAATTTT	Genebody	Chr11:1129003-1129209(+)	100	111	+	7.53061	1.05e-05	0.112

## Sheet: Table S3
Table S3. Sequence annotations of OsPRR37-interacting proteins identified by yeast two-hybrid screening.
Clone_number	MSU ID	Gene_name	RAP ID
1	LOC_Os02g01360	OsHLS1|qHd2-1	Os02g0104200
2	LOC_Os05g04530	LOC_Os05g04530	Os05g0135900
3	LOC_Os02g42660	LOC_Os02g42660	Os02g0639600
4	LOC_Os02g02750	LOC_Os02g02750	Os02g0119800
5	LOC_Os01g24980	LOC_Os01g24980	Os01g0351800
7	LOC_Os04g57590	LOC_Os04g57590	Os04g0671700
8	LOC_Os07g49470	LOC_Os07g49470	Os07g0695300
10	LOC_Os05g45420	OsSnRK1A	Os05g0530500
11	LOC_Os03g29810	NAL9|VYL	Os03g0411500
12	LOC_Os11g44870	LOC_Os11g44870	Os11g0672300
20	LOC_Os02g02750	LOC_Os02g02750	Os02g0119800
21	LOC_Os02g02750	LOC_Os02g02750	Os02g0119800
22	LOC_Os03g21400	CYP714B2	Os03g0332100
27	LOC_Os07g48596	LOC_Os07g48596	Os07g0685300
30	LOC_Os08g42560	OsGlyRS3	Os08g0538000
36	LOC_Os02g23823	LOC_Os02g23823	Os02g0433600
37	LOC_Os03g08550	LOC_Os03g08550	Os03g0183800
39	LOC_Os10g40934	LOC_Os10g40934	Os10g0558750
43	LOC_Os11g44870	LOC_Os11g44870	Os11g0672300
44	LOC_Os07g16970	LOC_Os07g16970	Os07g0271000
48	LOC_Os03g08870	LOC_Os03g08870	Os03g0187700
49	LOC_Os02g15660	LOC_Os02g15660	Os02g0255700
50	LOC_Os01g42500	LOC_Os01g42500	Os01g0610700
51	LOC_Os03g22830	LOC_Os03g22830	Os03g0351800
52	LOC_Os08g01740	LOC_Os08g01740	Os08g0109000
53	LOC_Os01g67370	LOC_Os01g67370	Os01g0899500
54	LOC_Os02g58620	LOC_Os02g58620	Os02g0833100
55	LOC_Os01g32730	OsFLU1	Os01g0510600
56	LOC_Os05g41450	OsHAPL1	Os05g0494100
Note: Clones 14, 24, 47, and 58 (Fig. 6A) were excluded due to unsuccessful PCR amplification. Duplicate clones include 12 and 43, as well as 4, 20, and 21.

## Sheet: Table S4
Table S4. ColabFold-based predictions of putative OsPRR37-interacting proteins.
MSU	Gene_name	pLDDT	pTM	ipTM	pTM+ipTM (Score)
LOC_Os01g24980	LOC_Os01g24980	47.8	0.408	0.466	0.874
LOC_Os01g32730	OsFLU1	37.1	0.257	0.328	0.585
LOC_Os01g42500	LOC_Os01g42500	40.2	0.25	0.182	0.432
LOC_Os01g67370	LOC_Os01g67370	37.9	0.339	0.303	0.642
LOC_Os02g02750	LOC_Os02g02750	47.5	0.404	0.226	0.63
LOC_Os02g01360	OsHLS1|qHd2-1	30.8	0.281	0.216	0.497
LOC_Os02g15660	LOC_Os02g15660	30.8	0.265	0.239	0.504
LOC_Os02g23823	LOC_Os02g23823	34.5	0.3	0.309	0.609
LOC_Os02g42660	OsDES1	47.6	0.381	0.261	0.642
LOC_Os02g58620	LOC_Os02g58620	53	0.373	0.285	0.658
LOC_Os03g08550	LOC_Os03g08550	49.9	0.385	0.395	0.78
LOC_Os03g08870	LOC_Os03g08870	32.4	0.26	0.22	0.48
LOC_Os03g21400	CYP714B2	46	0.417	0.243	0.66
LOC_Os03g22830	LOC_Os03g22830	32.8	0.278	0.251	0.529
LOC_Os03g29810	NAL9|VYL	41.2	0.322	0.365	0.687
LOC_Os04g57590	LOC_Os04g57590	51.6	0.423	0.2	0.623
LOC_Os05g04530	LOC_Os05g04530	35	0.252	0.179	0.431
LOC_Os05g41450	OsHAPL1	35.4	0.308	0.326	0.634
LOC_Os05g45420	OsSnRK1A	47.7	0.384	0.463	0.847
LOC_Os07g16970	LOC_Os07g16970	51.3	0.509	0.746	1.255
LOC_Os07g48596	LOC_Os07g48596	31.6	0.262	0.201	0.463
LOC_Os07g49470	LOC_Os07g49470	43.6	0.389	0.407	0.796
LOC_Os08g01740	LOC_Os08g01740	36	0.329	0.354	0.683
LOC_Os08g42560	OsGlyRS3	55.9	0.518	0.427	0.945
LOC_Os10g40934	LOC_Os10g40934	44.7	0.405	0.27	0.675
LOC_Os11g44870	LOC_Os11g44870	35.3	0.288	0.332	0.62
Note: Proteins shown in red have high pTM+ipTM scores (> 0.75)
